# Supplementary material for: LTQ-Orbitrap-based strategy for traditional Chinese medicine targeted class discovery, identification and herbomics research: a case study on phenylethanoid glycosides in three different species of Herba Cistanches
Source: Royal Society of Chemistry journal article supplement (doi:10.1039/c5ra13276b), 2015-01-01
Supplement: c5ra13276b1.pdf [file c5ra13276b1.pdf]

## ELECTRONIC SUPPLEMENTARY INFORMATION

### LTQ–Orbitrap–based strategy for traditional Chinese medicine 1 targeted class discovery, identification and herbomics research: a case study on phenylethanoid glycosides in three different species of *Herba Cistanches*

Jiayu Zhang<sup>a</sup>, Chen Lib, Yanyun Chec, Jiarui Wu<sup>a</sup>, Zijian Wang<sup>a</sup>, Wei Cai<sup>a</sup>, Yun Lia, Zhiguo Mad\*, Pengfei Tu<sup>a\*</sup>

<sup>a</sup> *Beijing University of Chinese Medicine, Beijing 100029, China*

<sup>b</sup> *Thermo Fisher Scientific, Shanghai, 201206, China*

<sup>c</sup> *Yunnan University of Traditional Chinese Medicine, Kunming, 650500, China*

<sup>d</sup> *College of Pharmacy, Jinan University, Guangzhou, 510632, China*

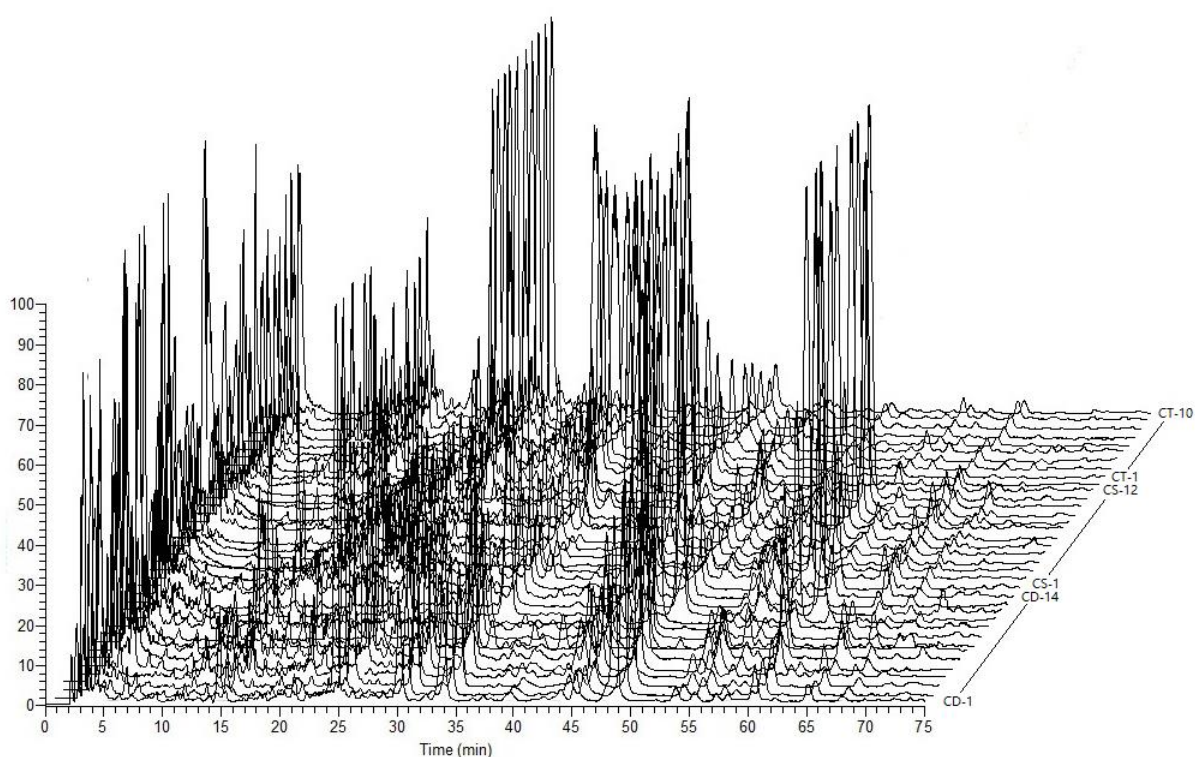

**Fig. 1S.** All the TIC chromatograms of *Herba Cistanches* from three different *Cistanche* species.
